# Supplementary material for: Size-controlled synthesis and morphology evolution of bismuth trifluoridenanocrystalsvia a novel solvent extraction route
Source: Royal Society of Chemistry journal article supplement (doi:10.1039/c2nr33212d), 2012-11-21
Supplement: c2nr33212d.pdf [file c2nr33212d.pdf]

## **Supporting Information for**

### **Size-Controlled Synthesis and Morphology-Evolution of Bismuth Trifluoride Nanocrystals via a Novel Solvent Extraction Route**

Junmei Zhao<sup>a\*</sup>, Huilin Pan<sup>b</sup>, Xiang He<sup>b</sup>, Yuesheng Wang<sup>b</sup>, Lin Gu<sup>b</sup>, Yong-Sheng Hu<sup>b</sup>,  
Liquan Chen<sup>b</sup>, Huizhou Liu<sup>a\*</sup>, Sheng Dai<sup>c</sup>

<sup>a</sup> Key Laboratory of Green Process and Engineering, Institute of Process Engineering, Chinese Academy of Sciences, Beijing 100190, China. E-mail: jmzhao@home.ipe.ac.cn

<sup>b</sup> Beijing National Laboratory for Condensed Matter Physics, Institute of Physics, Chinese Academy of Sciences, Beijing 100190, China.

<sup>c</sup> Chemical Sciences Division, Oak Ridge National Laboratory, Oak Ridge, TN 37831, USA

## **Experimental Section**

### ***Materials:***

Acid-base-coupled extractant (PN) was obtained through the reaction of equal mols of the commercial extractants PC-88A and N1923. PC-88A (purity > 95%) and N1923 (purity > 99%) were kindly supplied by Shanghai Organic Chemistry Institute (Chinese Academy of Sciences), and they were used without further purification. Organophosphorus acid, PC-88A, the effective component of which is 2-ethylhexyl 2-ethylhexyl-phosphonic acid, is an excellent reagent for the solvent extraction of various metals. Secondary carbon primary amine N1923, with two straight chain alkyls and an average molecular weight of 280.69, can extract mineral acid and solubilize water.

### ***Synthesis of Bismuth Trifluoride Nanocrystals:***

Prepared PN in heptane (16%) is used to extract  $\text{Bi}^{3+}$  and hydrofluoric acid, respectively. Then the organic phases loaded with  $\text{Bi}^{3+}$  (PN-Bi) and HF (PN-HF) are used as the metal and fluorine sources for the formation of  $\text{BiF}_3$  nanocrystals, respectively. In a typical synthesis of  $\text{BiF}_3$  hexagonal nanoplates, 30 mL of PN-Bi containing 0.04 M  $\text{Bi}^{3+}$  and 6.1 mL of PN-HF containing 0.59 M HF are mixed together in an air atmosphere at room temperature according to a Bi/F molar ratio of 1:3 and the reaction is maintained for 1 h. Then the products are collected at the bottom of the vessel, after which the extractant PN can easily be recycled from the mother liquid after purifying with hydrochloric acid and water. Pure powders can be obtained by washing the samples with acetone or ethanol several times to remove the extractant. Finally, the product is dried in an oven at 60°C for 5 h and 300 mg of nanoparticles can be obtained, according to a yield of 94% based on the theoretical amount of 319 mg. The reaction can also be readily scaled up to meet the demand for the preparation of a larger amount of product. The reaction conditions can also be changed to prepare  $\text{BiF}_3$  nanocrystals of other shapes.

### ***Structure Characterizations:***

The structures of the materials were characterized with an X'Pert Pro MPD X-ray diffractometer (Philips, The Netherlands) using  $\text{Cu K}\alpha$  radiation (1.5405 Å). The morphologies of the materials were observed with a scanning electron microscope (Hitachi S-4800) and a transmission electron microscope (JEOL 2010). The Brunauer-Emmett-Teller (BET) surface area was deduced from an isotherm analysis.

Fourier transform infrared spectroscopy (FTIR) measurements were performed on a Bruker Tensor 27 Spectrometer using KBr pellets (32 scans at a resolution of  $4\text{ cm}^{-1}$ ) in transmission mode. An acid-base titration method using standard NaOH solution was used to determine the HF concentration in the reversed micelle systems. A complexometric titration method with standard EDTA solution was used to determine the  $\text{Bi}^{3+}$  concentration in the bottom aqueous phase. The concentrations of  $\text{Bi}^{3+}$  in the upper organic phases were determined by difference.

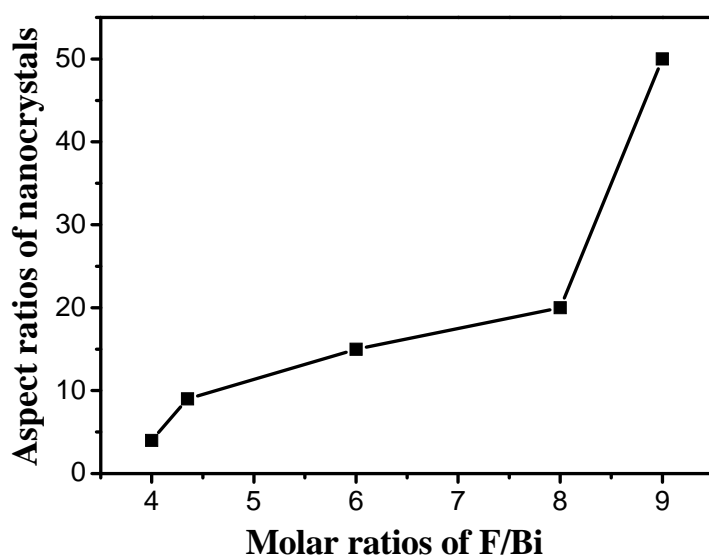

Figure S1. The relationship between aspect ratio of obtained nanocrystals and molar ratio of F:Bi in precursors.

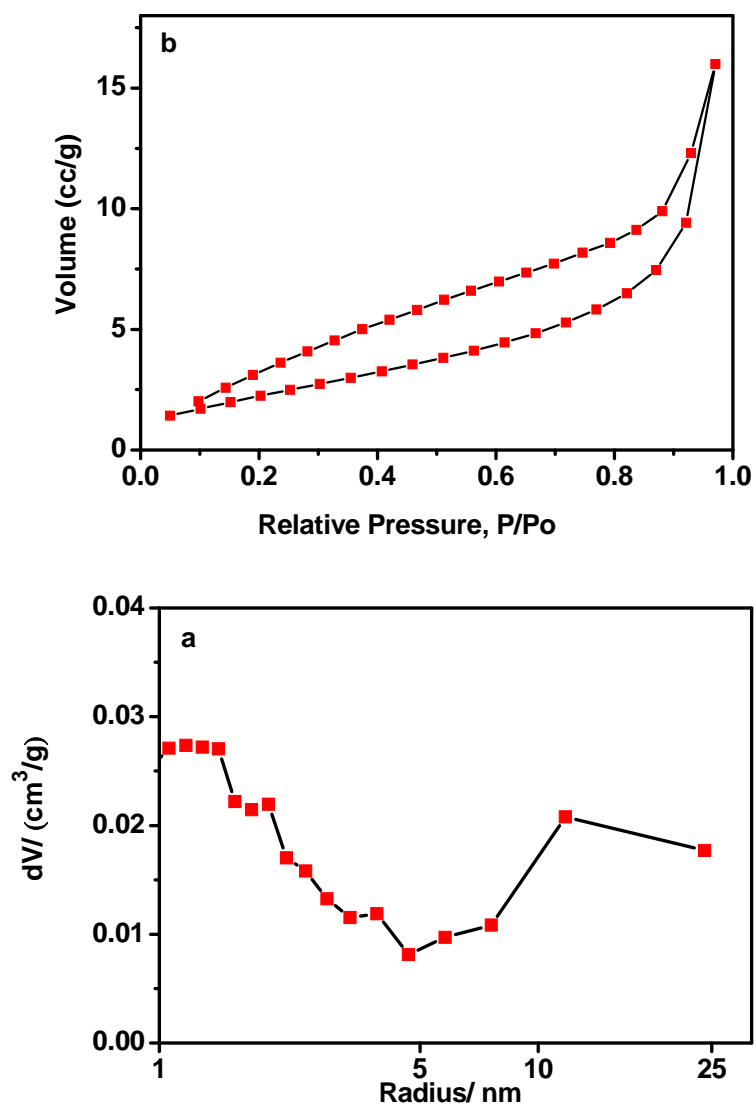

Figure S2. a) Typical nitrogen adsorption/desorption isotherms of the as-synthesized  $\text{BiF}_3$ ; b) Pore diameter distribution plot for the as-synthesized  $\text{BiF}_3$ .

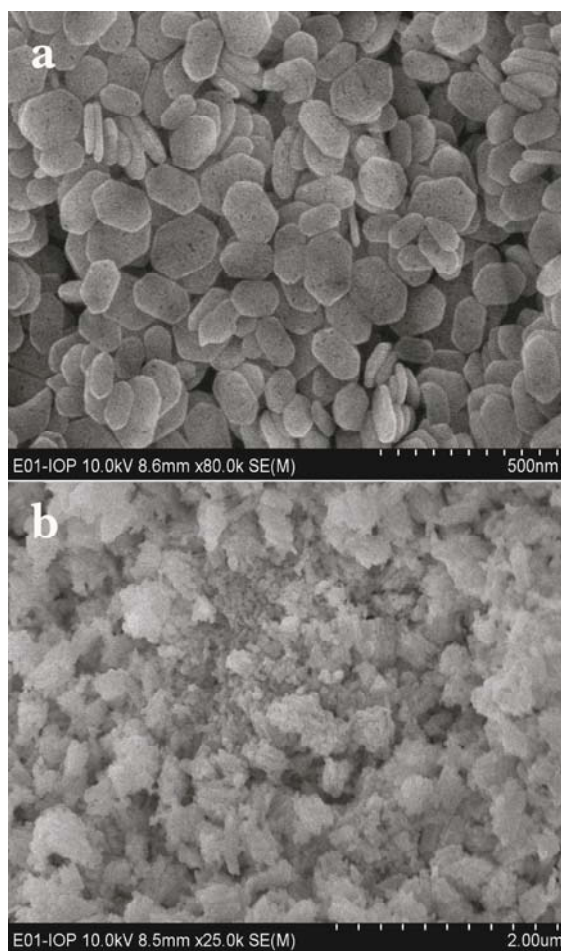

Figure S3. SEM images of hexagonal nanoplate  $\text{BiF}_3$  before (a) and after calcination (b) at  $300^\circ\text{C}$  for 2 h.

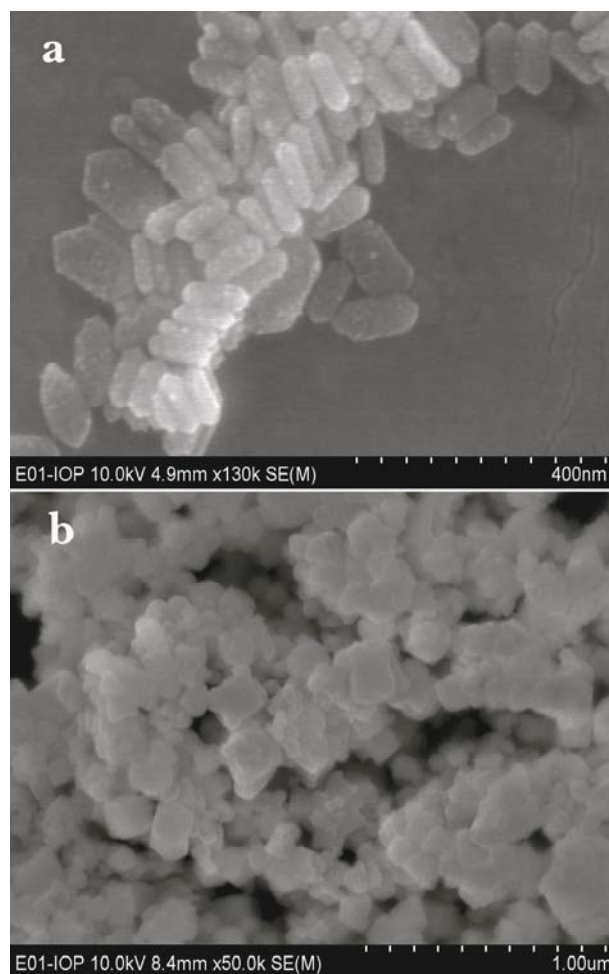

Figure S4. SEM image of the as-prepared BiF<sub>3</sub> sample washed only by acetone or ethanol (a). SEM image of the same sample washed by acetone or ethanol together with water (b).

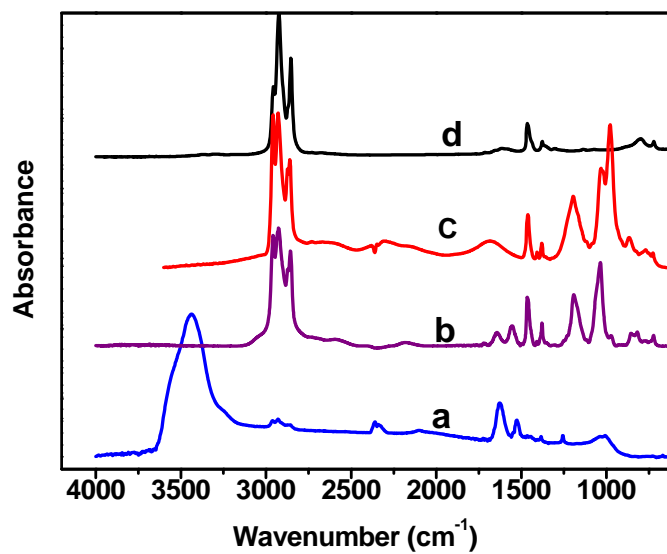

Figure S5. FTIR spectra for a) as-synthesized  $\text{BiF}_3$  powder, b) pure PN, c) pure PC-88A and d) pure N1923.

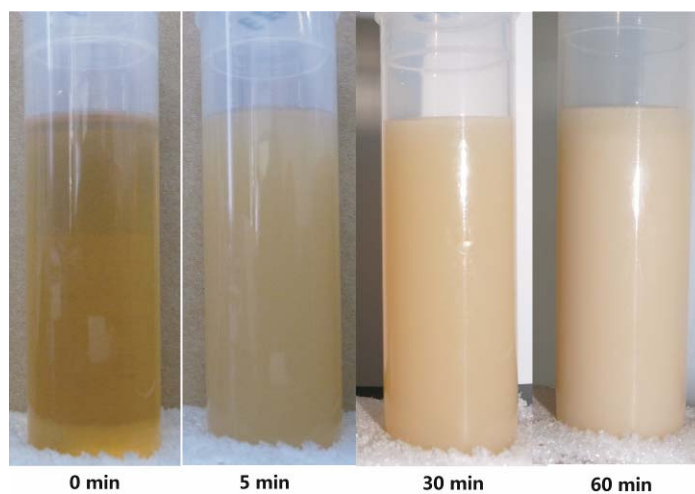

Figure S6. Digital photos for the formation of precipitation at different reaction times.
